# Supplementary material for: On the understanding of tropospheric fast photochemistry: airborne observations of peroxy radicals during the EMeRGe-Europe campaign
Source: Copernicus journal article supplement (doi:10.5194/acp-2022-119), 2022-02-18
Supplement: Supplementary file 1 [file acp-2022-119-supplement.pdf]

# Supplementary information

1

## 2 I. Reactions and rate coefficients used in the current study

3 The temperature dependent rate coefficients of the bimolecular reactions are calculated using the Arrhenius expression:

$$4 \quad k(T) = A \times e^{(-E/RT)} \quad \text{Eq. S1}$$

5 The low-pressure-limiting rate coefficients for termolecular reactions are given in the form:

$$6 \quad k_0(T) = k_{0,298} \times (T/298)^{-n} \text{ cm}^6 \text{ molecules}^{-2} \text{ s}^{-1} \quad \text{Eq. S2}$$

7 The high-pressure-limiting rate coefficients for termolecular reactions are given in the form:

$$8 \quad k_\infty(T) = k_{\infty,298} \times (T/298)^{-m} \text{ cm}^3 \text{ molecules}^{-1} \text{ s}^{-1} \quad \text{Eq. S3}$$

9 The following formula calculates the effective second-order rate coefficients for a given condition of temperature and pressure (altitude) (Burkholder et al., 2019).

$$10 \quad k_f(T, [M]) = \frac{k_\infty(T)k_0(T)[M]}{k_\infty(T) + k_0(T)[M]} 0.6 \left\{ 1 + \left[ \log_{10} \left( \frac{k_0(T)[M]}{k_\infty(T)} \right) \right]^2 \right\}^{-1} \quad \text{Eq. S4}$$

11 Where [M] is the total gas concentration.

12 Table S1: Reactions and corresponding rate coefficients taken from Burkholder et al., 2019. The radical intermediate formed during OVCO oxidation and photolysis  
13 are assumed to be converted to  $\text{RO}_2^*$ , and the oxidation reaction or the photolysis is taken as the rate-determining step.

| Number | Reaction                                                                 | A-Factor                 | E/R | k (298 K)<br>or<br>k <sub>total</sub> (298K, 1atm) | k <sub>0</sub> (T) =<br>k <sub>0,298</sub> × (T/298) <sup>-n</sup> |   | k <sub>∞</sub> (T) =<br>k <sub>∞,298</sub> × (T/298) <sup>-m</sup> |   |
|--------|--------------------------------------------------------------------------|--------------------------|-----|----------------------------------------------------|--------------------------------------------------------------------|---|--------------------------------------------------------------------|---|
|        |                                                                          |                          |     |                                                    | k <sub>0,298</sub>                                                 | n | k <sub>∞,298</sub>                                                 | m |
| R1     | <sup>(a)</sup> O <sub>3</sub> + hv → O( <sup>1</sup> D) + O <sub>2</sub> |                          |     |                                                    |                                                                    |   |                                                                    |   |
| R2a    | O( <sup>1</sup> D) + H <sub>2</sub> O → 2OH                              | 1.63 × 10 <sup>-10</sup> | -60 | 2.0 × 10 <sup>-10</sup>                            |                                                                    |   |                                                                    |   |

| Number | Reaction                                                                                                                                        | A-Factor                 | E/R  | k (298 K)<br>or<br>k <sub>total</sub> (298K, 1atm) | k <sub>0</sub> (T) =<br>k <sub>0</sub> <sup>298</sup> × (T/298) <sup>-n</sup> |     | k <sub>∞</sub> (T) =<br>k <sub>∞</sub> <sup>298</sup> × (T/298) <sup>-m</sup> |      |
|--------|-------------------------------------------------------------------------------------------------------------------------------------------------|--------------------------|------|----------------------------------------------------|-------------------------------------------------------------------------------|-----|-------------------------------------------------------------------------------|------|
|        |                                                                                                                                                 |                          |      |                                                    | k <sub>0</sub> <sup>298</sup>                                                 | n   | k <sub>∞</sub> <sup>298</sup>                                                 | m    |
| R2b    | O( <sup>1</sup> D) + O <sub>2</sub> → O( <sup>3</sup> P) + O <sub>2</sub>                                                                       | 3.3 × 10 <sup>-11</sup>  | -55  | 3.95 × 10 <sup>-11</sup>                           |                                                                               |     |                                                                               |      |
| R2c    | O( <sup>1</sup> D) + N <sub>2</sub> → O( <sup>3</sup> P) + N <sub>2</sub>                                                                       | 2.15 × 10 <sup>-11</sup> | -110 | 3.1 × 10 <sup>-11</sup>                            |                                                                               |     |                                                                               |      |
| R3     | HONO + hv → OH + NO                                                                                                                             |                          |      |                                                    |                                                                               |     |                                                                               |      |
| R4     | H <sub>2</sub> O <sub>2</sub> + hv → 2OH                                                                                                        |                          |      |                                                    |                                                                               |     |                                                                               |      |
| R5     | OH + O <sub>3</sub> → HO <sub>2</sub> + O <sub>2</sub>                                                                                          | 1.7 × 10 <sup>-12</sup>  | 940  | 7.3 × 10 <sup>-14</sup>                            |                                                                               |     |                                                                               |      |
| R6     | OH + CO + O <sub>2</sub> <sup>M</sup> → HO <sub>2</sub> + CO <sub>2</sub>                                                                       |                          |      | 2.4 × 10 <sup>-13</sup>                            | 6.9 × 10 <sup>-33</sup>                                                       | 2.1 | 1.1 × 10 <sup>-12</sup>                                                       | -1.3 |
| R7     | <sup>(b)</sup> OH + CH <sub>4</sub> + O <sub>2</sub> → CH <sub>3</sub> O <sub>2</sub> + H <sub>2</sub> O                                        | 2.45 × 10 <sup>-12</sup> | 1775 | 6.3 × 10 <sup>-15</sup>                            |                                                                               |     |                                                                               |      |
| R8     | <sup>(c)</sup> HCHO + hv + 2O <sub>2</sub> → 2HO <sub>2</sub> + CO                                                                              |                          |      |                                                    |                                                                               |     |                                                                               |      |
| R9     | <sup>(d)</sup> CH <sub>3</sub> CHO + hv + 2O <sub>2</sub> → CH <sub>3</sub> O <sub>2</sub> + HO <sub>2</sub> + CO                               |                          |      |                                                    |                                                                               |     |                                                                               |      |
| R10a   | <sup>(e)</sup> CH <sub>3</sub> C(O)CH <sub>3</sub> + hv + 2O <sub>2</sub> → CH <sub>3</sub> C(O)O <sub>2</sub> + CH <sub>3</sub> O <sub>2</sub> |                          |      |                                                    |                                                                               |     |                                                                               |      |
| R10b   | CH <sub>3</sub> C(O)CH <sub>3</sub> + hv + 2O <sub>2</sub> → 2 CH <sub>3</sub> O <sub>2</sub> + CO                                              |                          |      |                                                    |                                                                               |     |                                                                               |      |
| R11    | CHOCHO + hv + 2O <sub>2</sub> → 2HO <sub>2</sub> + 2CO                                                                                          |                          |      |                                                    |                                                                               |     |                                                                               |      |
| R12a   | OH + HCHO + O <sub>2</sub> → HO <sub>2</sub> + CO + H <sub>2</sub> O                                                                            | 5.5 × 10 <sup>-12</sup>  | -125 | 8.5 × 10 <sup>-12</sup>                            |                                                                               |     |                                                                               |      |
| R12b   | <sup>(f)</sup> OH + CH <sub>3</sub> CHO + O <sub>2</sub> <sup>M</sup> → CH <sub>3</sub> C(O)O <sub>2</sub> + H <sub>2</sub> O                   | 4.63 × 10 <sup>-12</sup> | -350 | 1.5 × 10 <sup>-11</sup>                            |                                                                               |     |                                                                               |      |
| R12c   | <sup>(g)</sup> OH + CH <sub>3</sub> C(O)CH <sub>3</sub> → H <sub>2</sub> O + CH <sub>3</sub> C(O)CH <sub>2</sub>                                |                          |      | See note                                           |                                                                               |     |                                                                               |      |
| R12d   | OH + CH <sub>3</sub> OH + O <sub>2</sub> → CH <sub>2</sub> O + HO <sub>2</sub> + H <sub>2</sub> O                                               | 2.9 × 10 <sup>-12</sup>  | 345  | 9.1 × 10 <sup>-13</sup>                            |                                                                               |     |                                                                               |      |
| R12e   | OH + CHOCHO + O <sub>2</sub> → HO <sub>2</sub> + H <sub>2</sub> O + 2CO                                                                         | 1.15 × 10 <sup>-11</sup> | 0    | 1.15 × 10 <sup>-11</sup>                           |                                                                               |     |                                                                               |      |
| R13    | <sup>(h)</sup> O <sub>3</sub> + CH <sub>2</sub> =C(CH <sub>3</sub> )CH=CH <sub>2</sub> → products                                               | 1.1 × 10 <sup>-14</sup>  | 2000 | 1.3 × 10 <sup>-17</sup>                            |                                                                               |     |                                                                               |      |

| Number | Reaction                                                                                                                    | A-Factor                    | E/R  | k (298 K)<br>or<br>k <sub>total</sub> (298K, 1atm) | k <sub>0</sub> (T) =<br>k <sub>0</sub> <sup>298</sup> × (T/298) <sup>-n</sup> |     | k <sub>∞</sub> (T) =<br>k <sub>∞</sub> <sup>298</sup> × (T/298) <sup>-m</sup> |     |
|--------|-----------------------------------------------------------------------------------------------------------------------------|-----------------------------|------|----------------------------------------------------|-------------------------------------------------------------------------------|-----|-------------------------------------------------------------------------------|-----|
|        |                                                                                                                             |                             |      |                                                    | k <sub>0</sub> <sup>298</sup>                                                 | n   | k <sub>∞</sub> <sup>298</sup>                                                 | m   |
| R14    | <sup>(i)</sup> HO <sub>2</sub> + HO <sub>2</sub> → H <sub>2</sub> O <sub>2</sub> + O <sub>2</sub>                           | 3.0 × 10 <sup>-13</sup>     | -460 | 1.4 × 10 <sup>-12</sup>                            | See note                                                                      |     |                                                                               |     |
|        | $\xrightarrow{M}$ H <sub>2</sub> O <sub>2</sub> + O <sub>2</sub>                                                            | 2.1 × 10 <sup>-33</sup> [M] | -920 | 4.6 × 10 <sup>-32</sup> [M]                        |                                                                               |     |                                                                               |     |
| R15    | HO <sub>2</sub> + CH <sub>3</sub> O <sub>2</sub> → CH <sub>3</sub> OOH + O <sub>2</sub>                                     | 4.1 × 10 <sup>-13</sup>     | -750 | 5.2 × 10 <sup>-12</sup>                            |                                                                               |     |                                                                               |     |
| R16a   | <sup>(j)</sup> CH <sub>3</sub> O <sub>2</sub> + CH <sub>3</sub> O <sub>2</sub> → CH <sub>3</sub> OH + HCHO + O <sub>2</sub> | 9.5 × 10 <sup>-14</sup>     | -390 | 3.5 × 10 <sup>-13</sup>                            |                                                                               |     |                                                                               |     |
| R16b   | CH <sub>3</sub> O <sub>2</sub> + CH <sub>3</sub> O <sub>2</sub> → 2CH <sub>3</sub> O + O <sub>2</sub>                       | 9.5 × 10 <sup>-14</sup>     | -390 | 3.5 × 10 <sup>-13</sup>                            |                                                                               |     |                                                                               |     |
| R17    | OH + HO <sub>2</sub> → H <sub>2</sub> O + O <sub>2</sub>                                                                    | 4.8 × 10 <sup>-11</sup>     | -250 | 1.1 × 10 <sup>-10</sup>                            |                                                                               |     |                                                                               |     |
| R18a   | OH + OH $\xrightarrow{M}$ H <sub>2</sub> O <sub>2</sub>                                                                     |                             |      | 6.3 × 10 <sup>-12</sup>                            | 6.9 × 10 <sup>-31</sup>                                                       | 1.0 | 2.6 × 10 <sup>-11</sup>                                                       | 0   |
| R18b   | OH + OH → H <sub>2</sub> O + O( <sup>3</sup> P)                                                                             | 1.8 × 10 <sup>-12</sup>     | 0    | 1.8 × 10 <sup>-12</sup>                            |                                                                               |     |                                                                               |     |
| R19    | OH + NO $\xrightarrow{M}$ HONO                                                                                              |                             |      | 7.4 × 10 <sup>-12</sup>                            | 7.1 × 10 <sup>-31</sup>                                                       | 2.6 | 3.6 × 10 <sup>-11</sup>                                                       | 0.1 |
| R20    | OH + NO <sub>2</sub> $\xrightarrow{M}$ HNO <sub>3</sub>                                                                     |                             |      | 1.1 × 10 <sup>-11</sup>                            | 1.8 × 10 <sup>-30</sup>                                                       | 3.0 | 2.8 × 10 <sup>-11</sup>                                                       | 0   |
| R21    | OH + HONO → H <sub>2</sub> O + NO <sub>2</sub>                                                                              | 3.0 × 10 <sup>-12</sup>     | -250 | 6.9 × 10 <sup>-12</sup>                            |                                                                               |     |                                                                               |     |
| R22    | CH <sub>3</sub> O + NO $\xrightarrow{M}$ CH <sub>3</sub> ONO                                                                |                             |      | 2.9 × 10 <sup>-11</sup>                            | 2.3 × 10 <sup>-29</sup>                                                       | 2.8 | 3.8 × 10 <sup>-11</sup>                                                       | 0.6 |
| R23    | <sup>(k)</sup> HO <sub>2</sub> + NO → OH + NO <sub>2</sub>                                                                  | 3.44 × 10 <sup>-12</sup>    | -260 | 8.2 × 10 <sup>-12</sup>                            |                                                                               |     |                                                                               |     |

| Number | Reaction                                                                                 | A-Factor                | E/R  | k (298 K)<br>or<br>k <sub>total</sub> (298K, 1atm) | k <sub>0</sub> (T) =<br>k <sub>0</sub> <sup>298</sup> × (T/298) <sup>-n</sup> |   | k <sub>∞</sub> (T) =<br>k <sub>∞</sub> <sup>298</sup> × (T/298) <sup>-m</sup> |   |
|--------|------------------------------------------------------------------------------------------|-------------------------|------|----------------------------------------------------|-------------------------------------------------------------------------------|---|-------------------------------------------------------------------------------|---|
|        |                                                                                          |                         |      |                                                    | k <sub>0</sub> <sup>298</sup>                                                 | n | k <sub>∞</sub> <sup>298</sup>                                                 | m |
| R24    | HO <sub>2</sub> + O <sub>3</sub> → OH + 2O <sub>2</sub>                                  | 1.0 × 10 <sup>-14</sup> | 490  | 1.9 × 10 <sup>-15</sup>                            |                                                                               |   |                                                                               |   |
| R25    | <sup>(l)</sup> CH <sub>3</sub> O <sub>2</sub> + NO → CH <sub>3</sub> O + NO <sub>2</sub> | 2.8 × 10 <sup>-12</sup> | -300 | 7.7 × 10 <sup>-12</sup>                            |                                                                               |   |                                                                               |   |
| R26    | CH <sub>3</sub> O + O <sub>2</sub> → CH <sub>2</sub> O + HO <sub>2</sub>                 | 3.9 × 10 <sup>-14</sup> | 900  | 1.9 × 10 <sup>-15</sup>                            |                                                                               |   |                                                                               |   |

- 14 (a) The O<sub>3</sub> photolysis has a second channel O<sub>3</sub> + hv (λ < 320 nm) → O(<sup>3</sup>P) + O<sub>2</sub>. So, only the photolysis rate for R1 is used in the calculation.
- 15 (b) Reaction OH with CH<sub>4</sub> produces CH<sub>3</sub> and H<sub>2</sub>O. The CH<sub>3</sub> formed further reacts with O<sub>2</sub> to form CH<sub>3</sub>O<sub>2</sub>. The formation of CH<sub>3</sub>O<sub>2</sub> is assumed to be much faster than the CH<sub>3</sub> formation due to the high
- 16 amount of O<sub>2</sub> present in the atmosphere. So the reaction of OH with CH<sub>3</sub> is taken as the rate-determining step for R7.
- 17 (c) The HCHO photolysis has a second channel, HCHO + hv (λ < 320 nm) → H<sub>2</sub> + CO. So, only the photolysis rate for R8 is used in the calculation.
- 18 (d) The CH<sub>3</sub>CHO photolysis has a second channel CH<sub>3</sub>CHO + hv (λ < 320 nm) → CH<sub>4</sub> + CO. So, only the photolysis rate for R9 is used in the calculation.
- 19 (e) To simplify the calculation, the CH<sub>3</sub>C(O)O<sub>2</sub> produced is treated as a CH<sub>3</sub>O<sub>2</sub> molecule during the calculation.
- 20 (f) The reaction of OH with CH<sub>3</sub>CHO produces CH<sub>3</sub>C(O) and H<sub>2</sub>O. The CH<sub>3</sub>C(O) formed reacts with O<sub>2</sub> in a three-body reaction to form CH<sub>3</sub>C(O)O<sub>2</sub>. The formation of CH<sub>3</sub>C(O)O<sub>2</sub> is assumed to be
- 21 much faster than the CH<sub>3</sub>C(O) formation due to the high amount of O<sub>2</sub> present in the atmosphere. So the reaction of OH with CH<sub>3</sub>CHO is taken as the rate-determining step for R12b. To simplify the
- 22 calculation, the CH<sub>3</sub>C(O)O<sub>2</sub> produced is treated as a CH<sub>3</sub>O<sub>2</sub> molecule during the calculation.
- 23 (g) The temperature-dependent reaction rate coefficient is given by: k<sub>12c</sub>(T) = 1.33 × 10<sup>-13</sup> + 3.82 × 10<sup>-11</sup> × e<sup>(-2000/T)</sup> cm<sup>3</sup>molecules<sup>-1</sup>s<sup>-1</sup>. CH<sub>3</sub>C(O)CH<sub>2</sub> formed reacts with O<sub>2</sub> in a three-body reaction to
- 24 form CH<sub>3</sub>C(O)CH<sub>2</sub>O<sub>2</sub>. The formation of CH<sub>3</sub>C(O)CH<sub>2</sub>O<sub>2</sub> is assumed to be much faster than the CH<sub>3</sub>C(O)CH<sub>2</sub> formation due to the high amount of O<sub>2</sub> present in the atmosphere. So the reaction of OH
- 25 with CH<sub>3</sub>C(O)CH<sub>3</sub> is taken as the rate-determining step for R12c. To simplify the calculation, the CH<sub>3</sub>C(O)CH<sub>2</sub>O<sub>2</sub> produced is treated as a CH<sub>3</sub>O<sub>2</sub> molecule during the calculation.
- 26 (h) The reaction R13 shows an example of an ozonolysis reaction. To simplify the calculation, the ozonolysis reactions are not considered in this study.
- 27 (i) Reaction R14 exhibits a dependence on H<sub>2</sub>O concentration. So the overall rate coefficient is given by the sum of the bimolecular component and a pressure-dependent termolecular component
- 28 multiplied by the H<sub>2</sub>O enhancement term. i.e.,
- 29  $(1.4 \times 10^{-12} + 4.6 \times 10^{-32}[\text{M}])(1 + 1.4 \times 10^{-21}[\text{H}_2\text{O}]\text{exp}^{(2200/T)})$ .
- 30 (j) The CH<sub>3</sub>O<sub>2</sub> self-reaction has a second channel with relative product yield,  $\frac{k_{16b}}{k_{16a}} = (26.2 \pm 6.6) e^{(-1130 \pm 240)/T}$  (Tyndall et al., 2001).
- 31 (k) Note that the HO<sub>2</sub> + NO reaction have another channel producing HNO<sub>3</sub>. The probability of this channel is less than 1% and therefore negligible.
- 32 (l) Note that the CH<sub>3</sub>O<sub>2</sub> + NO reaction have another channel producing CH<sub>3</sub>NO<sub>2</sub>. The probability of this channel is less than 0.5% and therefore negligible.

### 33 II. Deviation of Eq. 6 and Eq. 7

34 An analytical equation to calculate  $RO_2^*$  was derived, assuming the primary source of  $RO_2^*$  production is precursor photolysis, the loss of  $RO_2^*$  is only through  $RO_2^*$   
 35  $- RO_2^*$  reactions, and the radical interconversion reactions between OH, RO and  $RO_2^*$  occurs without losses. Based on the results of previous airborne campaigns  
 36 (Tan et al., 2001 and Cantrell et al., 2003b), the production of  $RO_2^*$  from the photolysis of  $H_2O_2$  and ozonolysis of alkenes were assumed to have minor contribution  
 37 and are excluded from this study. In addition,  $CH_3O_2$  reactions were taken as a surrogate for all  $RO_2$  reactions to reduce the complexity of the calculations.

38 Under these assumptions and based on the reactions in Table S1

39 • The rate of change of  $[RO_2^*]$  is given by

$$\frac{d}{dt}([RO_2^*]) = \frac{d}{dt}([OH] + [CH_3O] + [HO_2] + [CH_3O_2])$$

$$\frac{d}{dt}([RO_2^*]) = 2j_1[O_3]\beta + j_3[HONO] + 2j_8[HCHO] + 2j_{11}[CHOCHO] + 2j_9[CH_3CHO] + 2(j_{10a} + j_{10b})[CH_3C(O)CH_3] - 2k_{15}[HO_2][CH_3O_2] - 2k_{14}[HO_2]^2 - 2k_{16a}[CH_3O_2]^2$$

40

Eq. S5

41 Where  $\beta$  is the fraction of  $O(^1D)$  reacts with  $H_2O$  to form OH and is given by  $\beta = \left( \frac{k_{2a}[H_2O]}{k_{2a}[H_2O] + k_{2b}[O_2] + k_{2c}[N_2]} \right)$

42 Now substituting  $[HO_2] = \delta[RO_2^*]$  and  $[CH_3O_2] = (1 - \delta)[RO_2^*]$  in Eq. S5

$$\frac{d}{dt}([RO_2^*]) = 2j_1[O_3]\beta + j_3[HONO] + 2j_8[HCHO] + 2j_{11}[CHOCHO] + 2j_9[CH_3CHO] + 2(j_{10a} + j_{10b})[CH_3C(O)CH_3] - 2k_{15}\delta(1 - \delta)[RO_2^*]^2 - 2k_{16a}((1 - \delta)[RO_2^*])^2 - 2k_{14}(\delta[RO_2^*])^2$$

43 Under photostationary steady-state (PSS)

$$\frac{d}{dt}([RO_2^*]) = 0$$

$$\Rightarrow 2j_1[O_3]\beta + j_3[HONO] + 2j_8[HCHO] + 2j_{11}[CHOCHO] + 2j_9[CH_3CHO] + 2(j_{10a} + j_{10b})[CH_3C(O)CH_3] = 2k_{15}\delta(1 - \delta)[RO_2^*]^2 + 2k_{16a}((1 - \delta)[RO_2^*])^2 + 2k_{14}(\delta[RO_2^*])^2$$

Eq. S6

46 Eq. S6 is a quadratic equation of  $[RO_2^*]$  without a linear term. The solution is given by

$$47 [RO_2^*]_c = \sqrt{\frac{P_{RO_2^*}}{2k_{RO_2^*}}}$$

Eq. S7

48  $k_{RO_2^*} = (k_{15}\delta(1 - \delta) + k_{16a}(1 - \delta)^2 + k_{14}\delta^2)$

$$P_{RO_2^*} = 2j_1[O_3]\beta + j_3[HONO] + 2j_8[HCHO] + 2j_{11}[CHOCHO] + 2j_9[CH_3CHO] + 2(j_{10a} + j_{10b})[CH_3C(O)CH_3]$$

49 Since the amount of OH and RO is much smaller than that of HO<sub>2</sub> and RO<sub>2</sub> in the atmosphere, RO<sub>2</sub><sup>\*</sup> to a good approximation is the sum of HO<sub>2</sub> and RO<sub>2</sub> radicals.

### 50 III. Derivation of Eq. 8 and Eq. 9

51 If the radical interconversion and the loss of OH and CH<sub>3</sub>O through the reaction with NO<sub>x</sub> during the interconversion are considered, then

52 • The rate of change of [OH] is given by

53  $\frac{d}{dt}([OH]) =$

54  $2j_1[O_3]\beta + j_3[HONO] + k_{23}[HO_2][NO] + k_{24}[HO_2][O_3] - [OH](k_5[O_3] + k_6[CO] + k_7[CH_4] + k_{12a}[HCHO] + k_{12b}[CH_3CHO] + k_{12c}[CH_3C(O)CH_3] +$   
 55  $k_{12d}[CH_3OH] + k_{12e}[CHOCHO] + k_{17}[HO_2] + k_{19}[NO] + k_{20}[NO_2] + k_{21}[HONO]) - 2(k_{18a} + k_{18b}) [OH]^2$  Eq. S8

56 Under photostationary steady-state

$$\frac{d}{dt}([OH]) = 0$$

57 i.e.,

58  $2j_1[O_3]\beta + j_3[HONO] + k_{23}[HO_2][NO] + k_{24}[HO_2][O_3] = [OH](k_5[O_3] + k_6[CO] + k_7[CH_4] + k_{12a}[HCHO] + k_{12b}[CH_3CHO] + k_{12c}[CH_3C(O)CH_3] +$   
 59  $k_{12d}[CH_3OH] + k_{12e}[CHOCHO] + k_{17}[HO_2] + k_{19}[NO] + k_{20}[NO_2] + k_{21}[HONO]) - 2(k_{18a} + k_{18b}) [OH]^2$  Eq. S9

60 Since the atmospheric [OH] and [HO<sub>2</sub>] << [NO] and [NO<sub>2</sub>], as a first approximation, the reactions R18 (OH – OH reaction) and R17 (OH – HO<sub>2</sub> reaction) are  
 61 assumed to be negligible in the loss process of OH compared to the OH – NO<sub>x</sub> reactions. So Eq. S9 can be modified as:

62  $[OH] = \frac{2j_1[O_3]\beta + j_3[HONO] + k_{23}[HO_2][NO] + k_{24}[HO_2][O_3]}{(k_5[O_3] + k_6[CO] + k_7[CH_4] + k_{12a}[HCHO] + k_{12b}[CH_3CHO] + k_{12c}[CH_3C(O)CH_3] + k_{12d}[CH_3OH] + k_{12e}[CHOCHO] + k_{17}[HO_2] + k_{19}[NO] + k_{20}[NO_2] + k_{21}[HONO])}$  Eq. S10

63 • The rate of change of [CH<sub>3</sub>O] is given by

64  $\frac{d}{dt}([CH_3O]) = 2k_{16b}[CH_3O_2]^2 + k_{25}[CH_3O_2][NO] - [CH_3O](k_{22}[NO] + k_{26}[O_2])$  Eq. S11

65 Under PSS

$$\frac{d}{dt}([CH_3O]) = 0$$

$$66 \Rightarrow [CH_3O] = \frac{2k_{16b}[CH_3O_2]^2 + k_{25}[CH_3O_2][NO]}{(k_{22}[NO] + k_{26}[O_2])} \quad \text{Eq. S12}$$

67 • The rate of change of  $[HO_2]$  is given by

$$68 \frac{d}{dt}([HO_2]) =$$

$$69 \quad 2j_8[HCHO] + j_9[CH_3CHO] + 2j_{11}[CHOCHO] + [OH](k_5[O_3] + k_6[CO] + k_{12a}[HCHO] + k_{12d}[CH_3OH] + k_{12e}[CHOCHO]) + k_{26}[CH_3O][O_2] -$$

$$70 \quad [HO_2](k_{15}[CH_3O_2] + k_{17}[OH] + k_{23}[NO] + k_{24}[O_3]) - 2k_{14}[HO_2]^2$$

71 Based on the assumption made for Eq. S10, the reaction R17 (OH – HO<sub>2</sub> reaction) is assumed to have a negligible contribution in the HO<sub>2</sub> loss process. So

$$72 \frac{d}{dt}([HO_2]) =$$

$$73 \quad 2j_8[HCHO] + j_9[CH_3CHO] + 2j_{11}[CHOCHO] + [OH](k_5[O_3] + k_6[CO] + k_{12a}[HCHO] + k_{12d}[CH_3OH] + k_{12e}[CHOCHO]) + k_{26}[CH_3O][O_2] -$$

$$74 \quad [HO_2](k_{15}[CH_3O_2] + k_{23}[NO] + k_{24}[O_3]) - 2k_{14}[HO_2]^2 \quad \text{Eq. S13}$$

75 • The rate of change of  $[CH_3O_2]$  is given by

$$76 \frac{d}{dt}([CH_3O_2]) = j_9[CH_3CHO] + 2j_{11}[CH_3C(O)CH_3] + [OH](k_7[CH_4] + k_{12b}[CHOCHO] + k_{12c}[CH_3C(O)CH_3]) - [CH_3O_2](k_{15}[HO_2] + k_{25}[NO]) -$$

$$77 \quad 2(k_{16a} + k_{16b})[CH_3O_2]^2 \quad \text{Eq. S14}$$

78 • If  $CH_3O_2$  is assumed as a surrogate for all  $RO_2^*$ , then the rate of change of  $[RO_2^*]$  is given by

$$\frac{d}{dt}([RO_2^*]) = \frac{d}{dt}([HO_2] + [CH_3O_2])$$

$$79 = 2j_8[HCHO] + j_9[CH_3CHO] + 2j_{11}[CHOCHO] + [OH](k_5[O_3] + k_6[CO] + k_{12a}[HCHO] + k_{12d}[CH_3OH] + k_{12e}[CHOCHO]) + k_{26}[CH_3O][O_2] -$$

$$80 \quad [HO_2](k_{15}[CH_3O_2] + k_{23}[NO] + k_{24}[O_3]) - 2k_{14}[HO_2]^2 + j_9[CH_3CHO] + 2(j_{10a} + j_{10b})[CH_3C(O)CH_3] + [OH](k_7[CH_4] + k_{12b}[CHOCHO] +$$

$$81 \quad k_{12c}[CH_3C(O)CH_3]) - [CH_3O_2](k_{15}[HO_2] + k_{25}[NO]) - 2(k_{16a} + k_{16b})[CH_3O_2]^2 \quad \text{Eq. S15}$$

82 Since OH and  $CH_3O$  are not measured on-board during EMeRGe, Eq. S10 and Eq. S12 are substituted in Eq. S15 and on rearranging.

$$83 \frac{d}{dt}([RO_2^*]) =$$

$$84 \quad 2j_8[HCHO] + j_9[CH_3CHO] + 2j_{11}[CHOCHO] + j_9[CH_3CHO] + 2(j_{10a} + j_{10b})[CH_3C(O)CH_3] +$$

$$85 \quad \frac{2j_1[O_3]\beta + j_3[HONO] + k_{23}[HO_2][NO] + k_{24}[HO_2][O_3]}{(k_5[O_3] + k_6[CO] + k_7[CH_4] + k_{12a}[HCHO] + k_{12b}[CH_3CHO] + k_{12c}[CH_3C(O)CH_3] + k_{12d}[CH_3OH] + k_{12e}[CHOCHO] + k_{17}[HO_2] + k_{19}[NO] + k_{20}[NO_2] + k_{21}[HONO])} (k_5[O_3] + k_6[CO] +$$

86  $k_7[CH_4] + k_{12a}[HCHO] + k_{12b}[CHOCHO] + k_{12c}[CH_3C(O)CH_3] + k_{12d}[CH_3OH] + k_{12e}[CHOCHO] + k_{26} \frac{2k_{16b}[CH_3O_2]^2 + k_{25}[CH_3O_2][NO]}{(k_{22}[NO] + k_{26}[O_2])} [O_2] -$   
 87  $[HO_2](k_{15}[CH_3O_2] + k_{23}[NO] + k_{24}[O_3]) - 2k_{14}[HO_2]^2 - [CH_3O_2](k_{15}[HO_2] + k_{25}[NO]) - 2(k_{16a} + k_{16b})[CH_3O_2]^2$  Eq. S16

88 Now substituting

89  $(1 - \rho) = \frac{(k_5[O_3] + k_6[CO] + k_7[CH_4] + k_{12a}[HCHO] + k_{12b}[CHOCHO] + k_{12c}[CH_3C(O)CH_3] + k_{12d}[CH_3OH] + k_{12e}[CHOCHO])}{(k_5[O_3] + k_6[CO] + k_7[CH_4] + k_{12a}[HCHO] + k_{12b}[CH_3CHO] + k_{12c}[CH_3C(O)CH_3] + k_{12d}[CH_3OH] + k_{12e}[CHOCHO] + k_{17}[HO_2] + k_{19}[NO] + k_{20}[NO_2] + k_{21}[HONO])}$  in Eq. S16 gives

90  $\frac{d}{dt}([RO_2^*]) =$   
 91  $2j_8[HCHO] + 2j_9[CH_3CHO] + 2j_{11}[CHOCHO] + 2(j_{10a} + j_{10b})[CH_3C(O)CH_3] + (2j_1[O_3]\beta + j_3[HONO] + k_{23}[HO_2][NO] + k_{24}[HO_2][O_3])(1 - \rho) +$   
 92  $k_{26} \frac{2k_{16b}[CH_3O_2]^2 + k_{25}[CH_3O_2][NO]}{(k_{22}[NO] + k_{26}[O_2])} [O_2] - [CH_3O_2](k_{15}[HO_2] + k_{25}[NO]) - 2(k_{16a} + k_{16b})[CH_3O_2]^2 - [HO_2](k_{15}[CH_3O_2] + k_{23}[NO] + k_{24}[O_3]) -$   
 93  $2k_{14}[HO_2]^2$  Eq. S17

94 Where  $\rho$  is the OH loss during the OH – RO<sub>2</sub><sup>\*</sup> interconversion

95 On rearranging

$$\begin{aligned} \frac{d}{dt}([RO_2^*]) = & (2j_1[O_3]\beta + j_3[HONO])(1 - \rho) + 2j_8[HCHO] + 2j_9[CH_3CHO] + 2(j_{10a} + j_{10b})[CH_3C(O)CH_3] + 2j_{11}[CHOCHO] \\ & + [HO_2](k_{23}[NO] + k_{24}[O_3])(1 - \rho) + k_{26} \frac{2k_{16b}[CH_3O_2]^2 + k_{25}[CH_3O_2][NO]}{(k_{22}[NO] + k_{26}[O_2])} [O_2] - [HO_2](k_{23}[NO] + k_{24}[O_3]) - k_{15}[HO_2][CH_3O_2] \\ & - k_{15}[HO_2][CH_3O_2] - (2k_{16b}[CH_3O_2]^2 + k_{25}[CH_3O_2][NO]) - 2k_{16a}[CH_3O_2]^2 - 2k_{14}[HO_2]^2 \end{aligned}$$

96 Combining common terms indicated by the same colours gives

97  $\frac{d}{dt}([RO_2^*]) = (2j_1[O_3]\beta + j_3[HONO])(1 - \rho) + 2j_8[HCHO] + 2j_9[CH_3CHO] + 2(j_{10a} + j_{10b})[CH_3C(O)CH_3] + 2j_{11}[CHOCHO] - [HO_2](k_{23}[NO] +$   
 98  $k_{24}[O_3])\rho - (2k_{16b}[CH_3O_2]^2 + k_{25}[CH_3O_2][NO]) \left( \frac{k_{22}[NO]}{(k_{22}[NO] + k_{26}[O_2])} \right) - 2k_{15}[HO_2][CH_3O_2] - 2k_{16a}[CH_3O_2]^2 - 2k_{14}[HO_2]^2$  Eq. S18

99 Under steady-state

$$\frac{d}{dt}([RO_2^*]) = 0$$



$$\begin{aligned} 100 \quad & \Rightarrow (2j_1[O_3]\beta + j_3[HONO])(1 - \rho) + 2j_8[HCHO] + 2j_9[CH_3CHO] + 2(j_{10a} + j_{10b})[CH_3C(O)CH_3] + 2j_{11}[CHOCHO] = [HO_2](k_{23}[NO] + k_{24}[O_3])\rho + \\ 101 \quad & (2k_{16b}[CH_3O_2]^2 + k_{25}[CH_3O_2][NO]) \left( \frac{k_{22}[NO]}{(k_{22}[NO] + k_{26}[O_2])} \right) + 2k_{15}[HO_2][CH_3O_2] + 2k_{16a}[CH_3O_2]^2 + 2k_{14}[HO_2]^2 \end{aligned} \quad \text{Eq. S19}$$

102 Now substituting  $[HO_2] = \delta [RO_2^*]$  and  $[CH_3O_2] = (1 - \delta) [RO_2^*]$  in Eq. S19

$$\begin{aligned} 103 \quad & (2j_1[O_3]\beta + j_3[HONO])(1 - \rho) + 2j_8[HCHO] + 2j_9[CH_3CHO] + 2(j_{10a} + j_{10b})[CH_3C(O)CH_3] + 2j_{11}[CHOCHO] = \delta[RO_2^*](k_{23}[NO] + k_{24}[O_3])\rho + \\ 104 \quad & \left( 2k_{16b}((1 - \delta)[RO_2^*])^2 + k_{25}(1 - \delta)[RO_2^*][NO] \right) \left( \frac{k_{22}[NO]}{(k_{22}[NO] + k_{26}[O_2])} \right) + 2k_{15}\delta(1 - \delta)[RO_2^*]^2 + 2k_{16a}((1 - \delta)[RO_2^*])^2 + 2k_{14}(\delta[RO_2^*])^2 \\ 105 \quad & \end{aligned} \quad \text{Eq. S20}$$

106 Eq. S20 is a quadratic equation of  $[RO_2^*]$ . The solution is given by

$$107 \quad [RO_2^*] = \frac{-(-L_{RO_2^*}) - \sqrt{L_{RO_2^*}^2 - 4(-2k_{RO_2^*})P_{RO_2^*}}}{2(-2k_{RO_2^*})} \quad \text{Eq. S21}$$

108 Where

$$109 \quad k_{RO_2^*} = \left( \left( k_{16b} \left( \frac{k_{22}[NO]}{(k_{22}[NO] + k_{26}[O_2])} \right) + k_{16a} \right) (1 - \delta)^2 + k_{15}\delta(1 - \delta) + k_{14}\delta^2 \right)$$

$$L_{RO_2^*} = \left( \delta(k_{23}[NO] + k_{24}[O_3])\rho + \left( \frac{k_{22}[NO]}{(k_{22}[NO] + k_{26}[O_2])} \right) k_{25}(1 - \delta)[NO] \right)$$

$$110 \quad P_{RO_2^*} = (2j_1[O_3]\beta + j_3[HONO])(1 - \rho) + 2j_8[HCHO] + 2j_9[CH_3CHO] + 2(j_{10a} + j_{10b})[CH_3C(O)CH_3] + 2j_{11}[CHOCHO]$$

111 • Special case I

112 When  $k_{19}[NO] + k_{20}[NO_2] + k_{21}[HONO] \ll$

113  $k_5[O_3] + k_6[CO] + k_7[CH_4] + k_{12a}[HCHO] + k_{12b}[CHOCHO] + k_{12c}[CH_3C(O)CH_3] + k_{12d}[CH_3OH] + k_{12e}[CHOCHO]$ , i.e.,  $\rho \approx 0$ , Eq. S19 can be  
114 simplified as:

115  $(2j_1[O_3]\beta + j_3[HONO]) + 2j_8[HCHO] + 2j_9[CH_3CHO] + 2(j_{10a} + j_{10b})[CH_3C(O)CH_3] + 2j_{11}[CHOCHO] = (2k_{16b}((1 - \delta)[RO_2^*])^2 + k_{25}(1 -$   
 116  $\delta)[RO_2^*][NO]) \left( \frac{k_{22}[NO]}{(k_{22}[NO] + k_{26}[O_2])} \right) + 2k_{15}\delta(1 - \delta)[RO_2^*]^2 + 2k_{16a}((1 - \delta)[RO_2^*])^2 + 2k_{14}(\delta[RO_2^*])^2$

117

Eq. S22

118  $L_{RO_2^*}$  and  $P_{RO_2^*}$  becomes

$$L_{RO_2^*} = \left( \frac{k_{22}[NO]}{(k_{22}[NO] + k_{26}[O_2])} \right) k_{25}(1 - \delta)[NO]$$

119  $P_{RO_2^*} = (2j_1[O_3]\beta + j_3[HONO]) + 2j_8[HCHO] + 2j_9[CH_3CHO] + 2(j_{10a} + j_{10b})[CH_3C(O)CH_3] + 2j_{11}[CHOCHO]$

120 • Special case II

121

122 If  $\rho \approx 0$  and OH and  $CH_3O$  are converted to  $RO_2^*$  without any losses, then Eq. S20 becomes Eq. S6 and the solution is given by Eq. S7
